# Supplementary material for: Ultrafast charge transfer dynamics in 2D covalent organic frameworks/Re-complex hybrid photocatalyst
Source: PubMed Central journal article supplement (PMC8837612; doi:10.1038/s41467-022-28409-2), 2022-02-11
Supplement: 41467_2022_28409_MOESM1_ESM.pdf [file 41467_2022_28409_MOESM1_ESM.pdf]

# Supplementary Information

1  
2  
3  
4  
5  
6  
7  
8  
9  
10

## Contents

|                                       |    |
|---------------------------------------|----|
| <b>Supplementary Figures</b> .....    | 2  |
| <b>Supplementary Tables</b> .....     | 11 |
| <b>Supplementary References</b> ..... | 33 |

11 **Supplementary Figures**

12

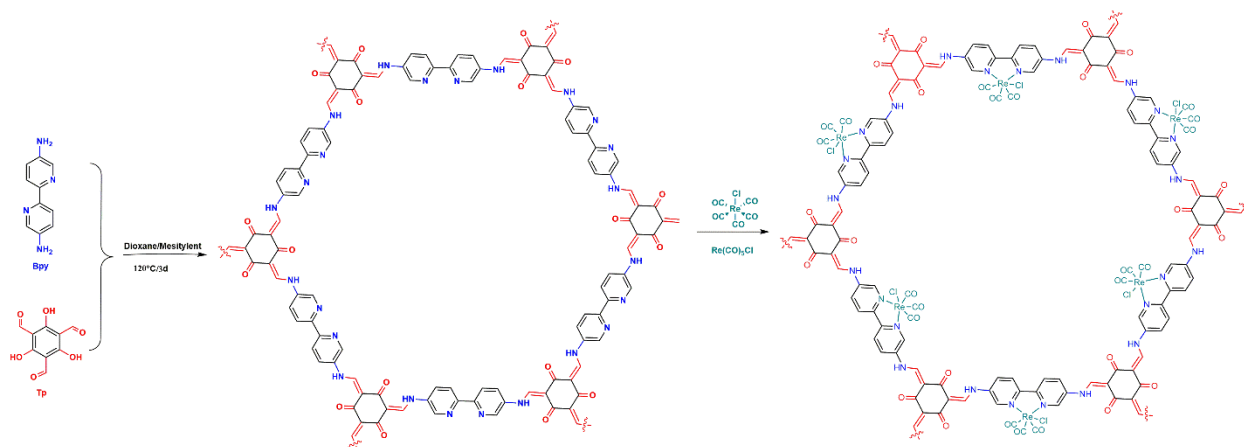

13

14 **Supplementary Figure 1: Re-COF Synthesis.** Synthesis scheme for TpBpy and Re-TpBpy.

15

16

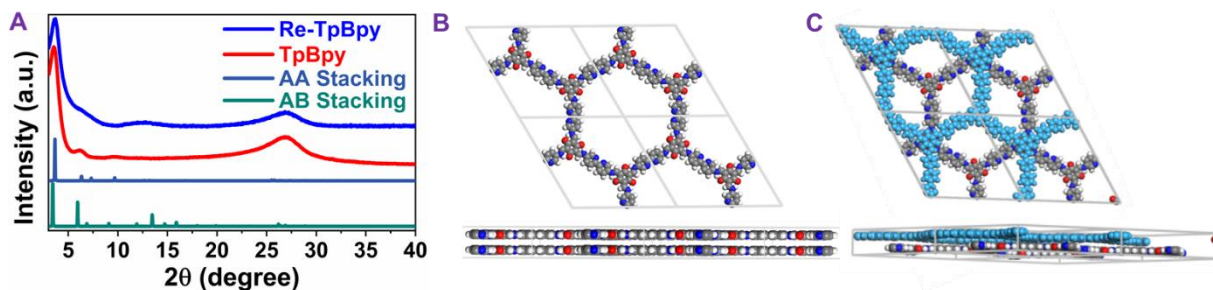

17

18

19 **Supplementary Figure 2: XRD characterization of the COF.** A) PXRD of TpBpy (red curve), Re-  
 20 TpBpy (blue curve), B) simulated AA stacking mode (Dark blue curve), and C) simulated AB stacking  
 21 mode (Dark green curve). **Source data are provided as a Source Data file.** The powder X-ray diffraction  
 22 (PXRD) patterns of both TpBpy and Re-TpBpy match well with the simulated AA stacking structure of  
 23 COFs in the hexagonal space group (P6). The pronounced peak at  $2\theta$  of  $3.6^\circ$  of both samples can be assigned  
 24 to the (100) plane of the TpBpy, which demonstrates that the crystalline structure of TpBpy is unchanged  
 25 after Re-complex incorporation. The broad peak between  $2\theta = 25.1^\circ$ - $28.1^\circ$  is attributed to the  $\pi$ - $\pi$  stacking  
 26 interlayers along the (001) plane<sup>1</sup>.

27

28

29

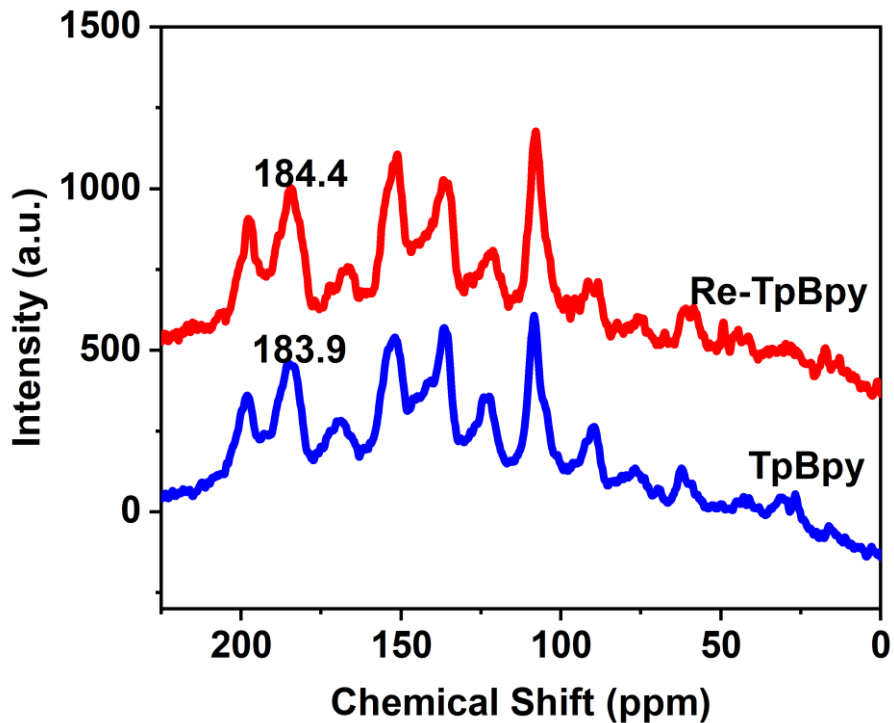

30  
 31 **Supplementary Figure 3: Solid-state NMR characterization.** Solid-state  $^{13}\text{C}$  NMR spectra of TpBpy  
 32 and Re-TpBpy. **Source data are provided as a Source Data file.** A slight shift in the area of 184 ppm  
 33 compared to the Re-TpBpy with pure TpBpy, which is due to the weak nonbonding interactions with the  
 34 pyridinic nitrogen of the bipyridinic. This observation confirms that the Re-complex was incorporated in  
 35 the TpBpy. A similar shift and assignment have also been evidenced in Ni-TpBpy with a similar structural  
 36 configuration<sup>2</sup>.

37

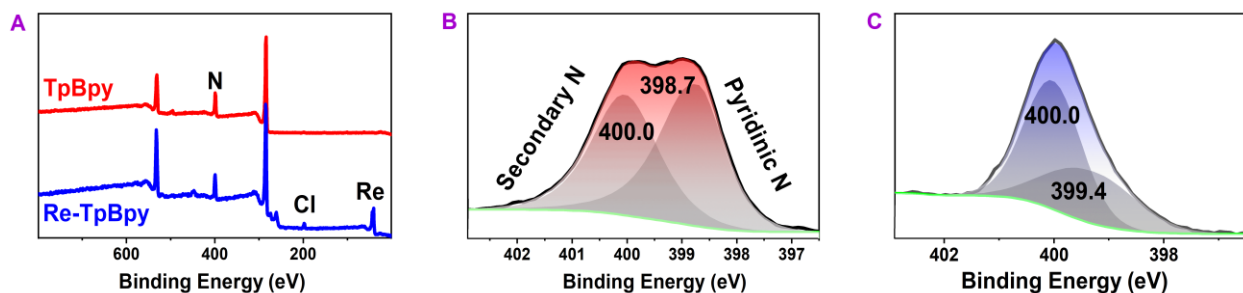

38  
 39 **Supplementary Figure 4: XPS characterization.** A) overview XPS spectrum of TpBpy and Re-TpBpy,  
 40 (B) and (C) correspond to the XPS N 1s core level spectra of TpBpy and Re-TpBpy, respectively. The  
 41 overview spectrum of Re-TpBpy displays the existence of Re and Cl elements in addition to C, O, N in  
 42 pristine TpBpy, suggesting the actual incorporation of the Re-complex in the host COF. More importantly  
 43 (Supplementary fig.4a), the two N 1S bands observed at 400.03 eV and 398.71 eV can be ascribed to the  
 44 secondary nitrogen and pyridinic nitrogen in TpBpy, respectively<sup>3,4</sup>. In Re-TpBpy, the pyridinic nitrogen

45 band is shifted to higher binding every (i.e. from 398.71 eV to 399.39 eV), while the peak position of the  
46 secondary nitrogen (Supplementary fig.4b, c) remains unchanged. This indicates that the Re-complex is  
47 anchored to the TpBpy only through its bipyridinic units<sup>5</sup>. **Source data are provided as a Source Data**  
48 **file.**

49

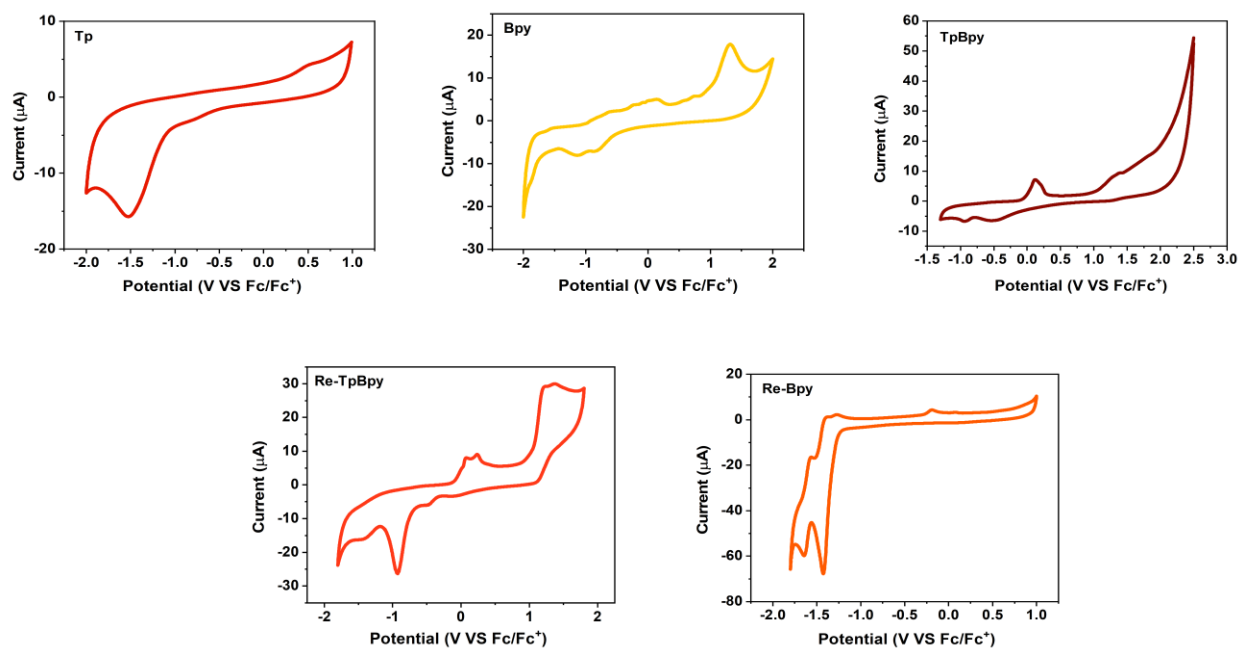

50

51 **Supplementary Figure 5: Electrochemistry characterization.** Cyclic voltammetry curves of samples.

52 **Source data are provided as a Source Data file.**

53

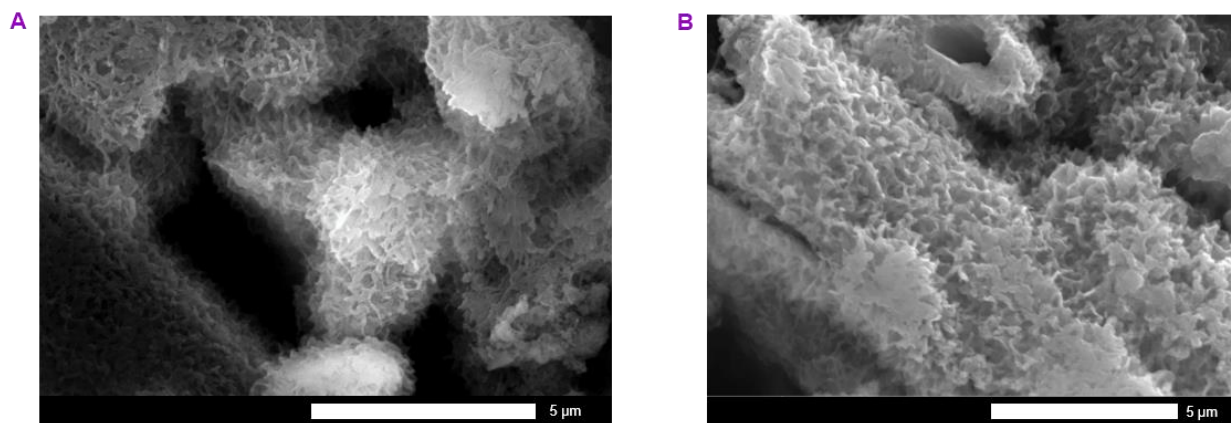

54

55 **Supplementary Figure 6: SEM characterization.** SEM image of TpBpy (A) and Re-TpBpy (B).

56

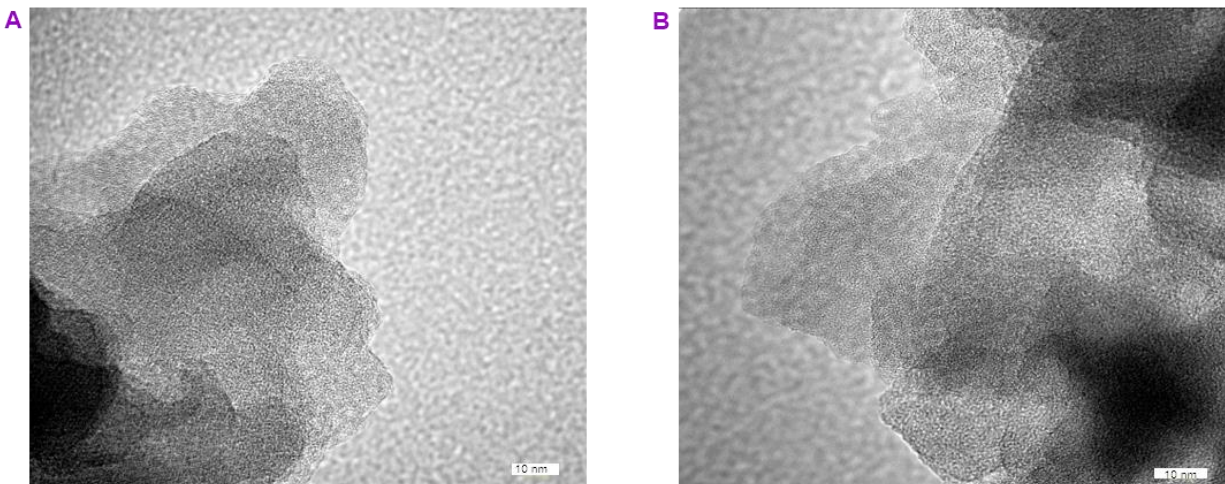

57  
 58 **Supplementary Figure 7: HR-TEM characterization.** HR-TEM image of TpBpy (A) and Re-TpBpy  
 59 (B).  
 60

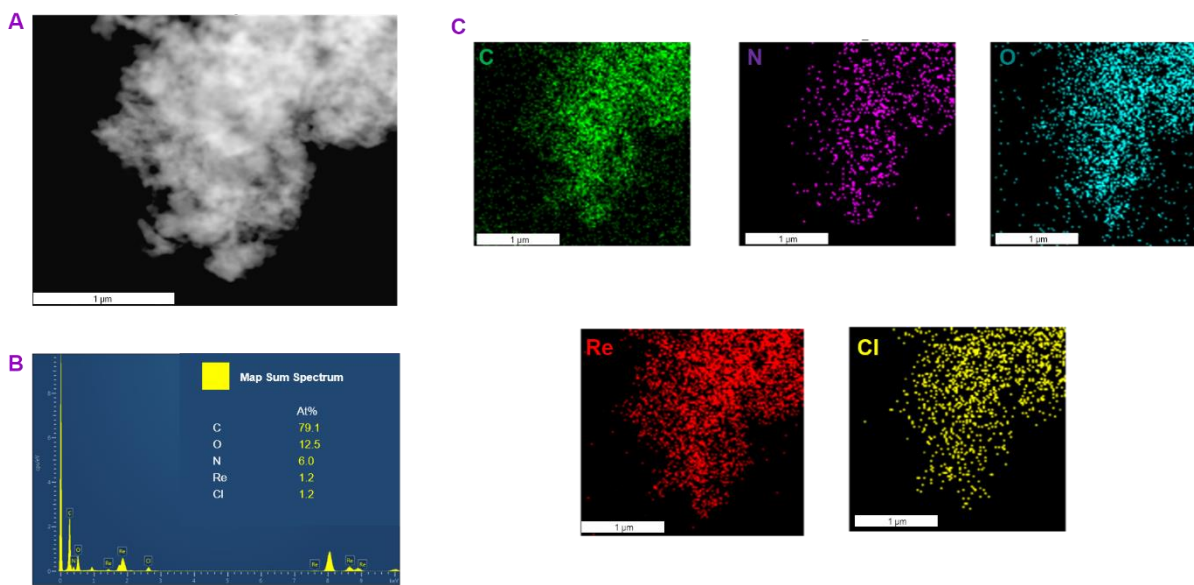

61  
 62 **Supplementary Figure 8: EDX characterization.** TEM image of Re-TpBpy (A), EDX Spectrum of Re-  
 63 TpBpy (B). The element analysis results of Re-TpBpy (C). **Source data are provided as a Source Data**  
 64 **file.** Compared the SEM image of Re-TpBpy with the original TpBpy, the Re-modified TpBpy did not  
 65 observe any significant changes in morphology (see see supplementary fig. 6). In addition, the TEM  
 66 image did not show the presence of any metal oxide particles in the COF matrix (see supplementary fig.  
 67 7). However, TEM-EDX mapping reveals a uniform distribution of Re content in Re-TpBpy (see  
 68 supplementary fig. 8).  
 69  
 70

71

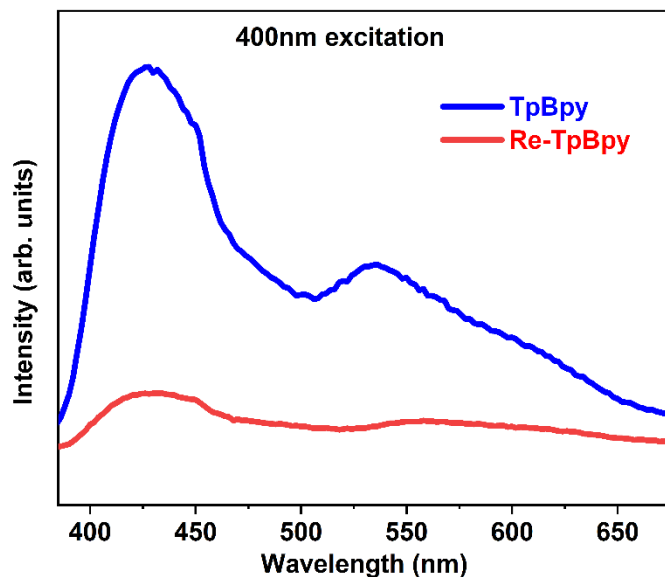

72

73 **Supplementary Figure 9: Steady-state PL measurement at 400 nm excitation.** Emission spectra of  
74 TpBpy and Re-TpBpy calibrated by the absorption at the 400 nm excitation wavelength. **Source data are**  
75 **provided as a Source Data file.**

76

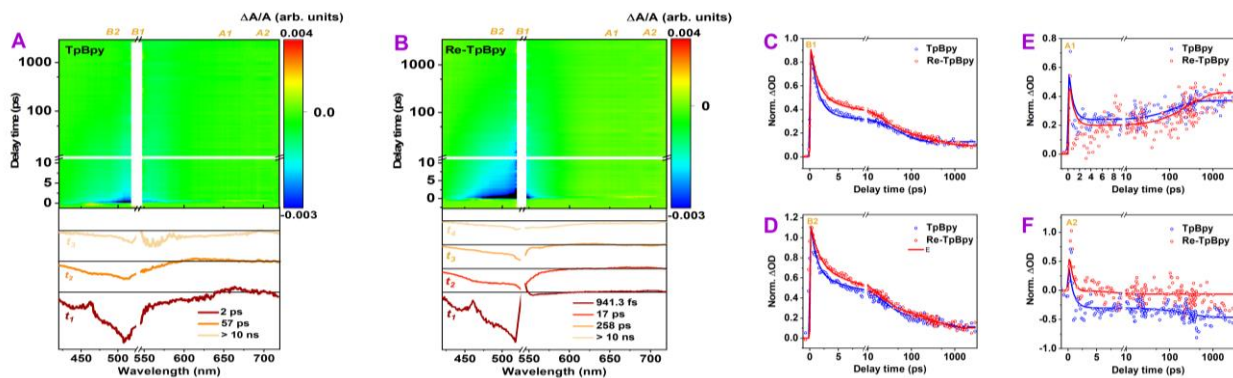

77

78 **Supplementary Figure 10: TA measurement at band edge excitation with high excitation intensity.**  
79 TA spectra under 530 nm excitation at the fluence of  $1 \times 10^{14}$  ph/cm<sup>2</sup> and the respective SVD fittings of  
80 TpBpy (A), Re-TpBpy (B). TA kinetics of two samples at various emission wavelengths of representing  
81 B1 (C), B2 (D), A1 (E), A2 (F). All spectra are recorded in Nafion (5% w/w in water and 1-propanol).  
82 **Source data are provided as a Source Data file.**



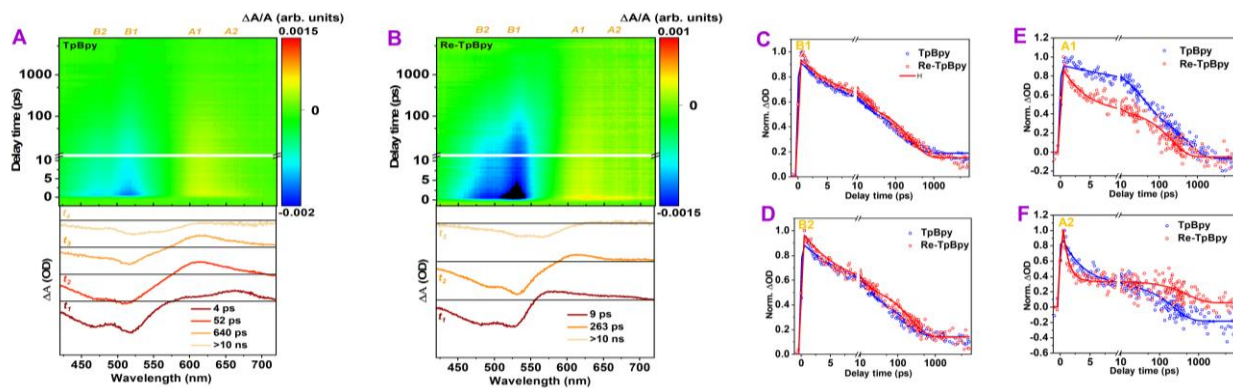

83  
 84 **Supplementary Figure 11: TA measurement at high excitation energy with high excitation intensity.**  
 85 TA spectra under 400 nm excitation at the fluence of  $1 \times 10^{14}$  ph/cm<sup>2</sup> and the respective SVD fittings of  
 86 TpBpy (A), Re-TpBpy (B). TA kinetics of two samples at various emission wavelengths of representing  
 87 B1 (C), B2 (D), A1 (E), A2 (F). All spectra are recorded in Nafion (5% w/w in water and 1-propanol).  
 88 **Source data are provided as a Source Data file.**

89  
 90  
 91

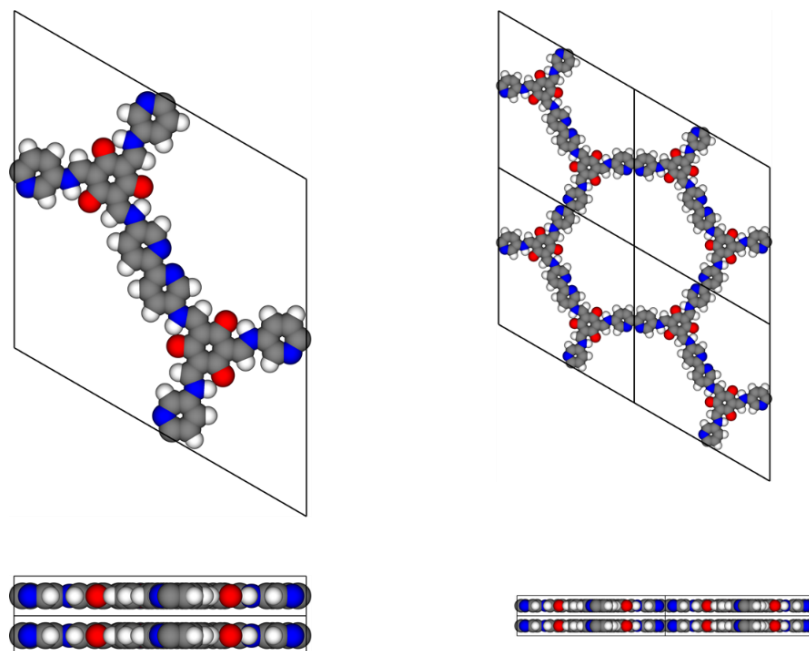

92  
 93 **Supplementary Figure 12: 3D view of the molecular structure for TpBpy.** Top-view and side-view of  
 94 simulated AA stacking mode of TpBpy, crystalline cell (left) and periodic crystal structure (right). TpBpy  
 95 exhibit the symmetry of P6 in its lattice.

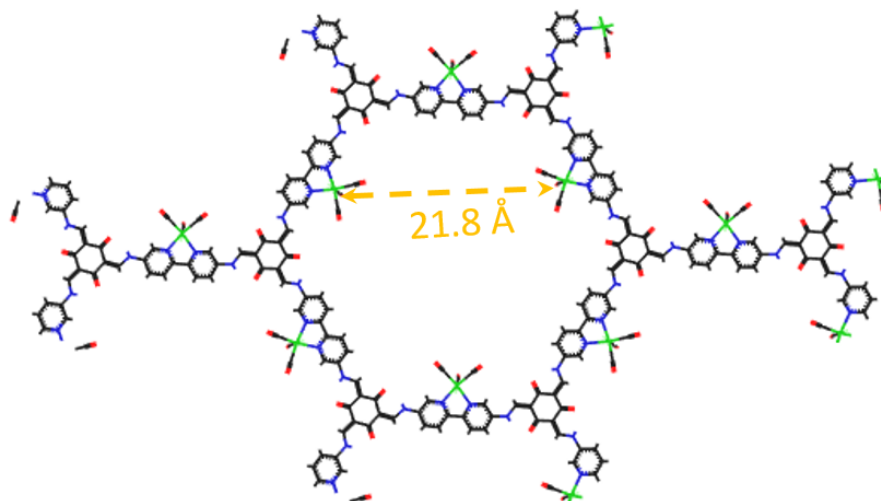

96  
 97 **Supplementary Figure 13: Calculation of the Re-to-Re spacing in Re-TpBpy.** Top view of crystalline  
 98 Structures of Re-TpBpy. The pore size is 21.8 Å according to the simulation.  
 99

100

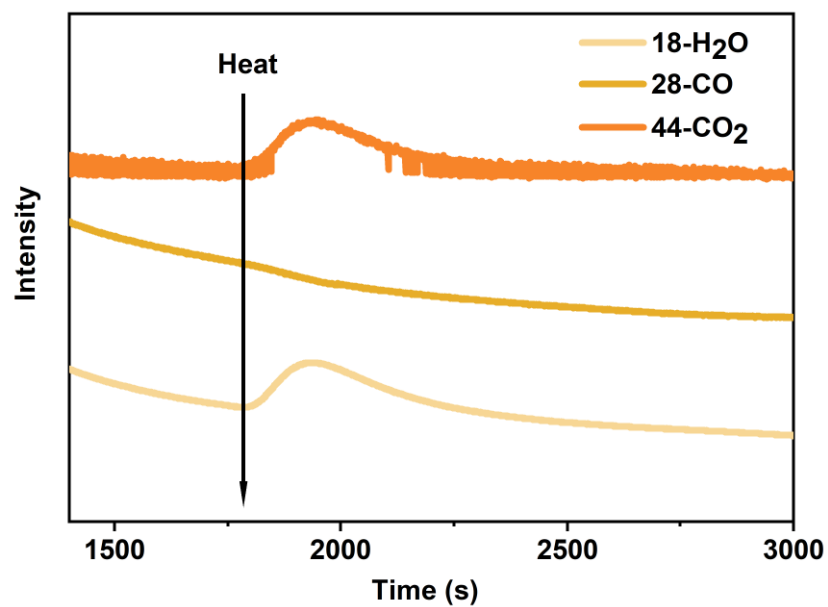

101  
 102 **Supplementary Figure 14: Thermal stability of the Re-COF.** The mass spectra of Re-TpBpy treated at  
 103 120 °C under the Ar atmosphere. **Source data are provided as a Source Data file.**



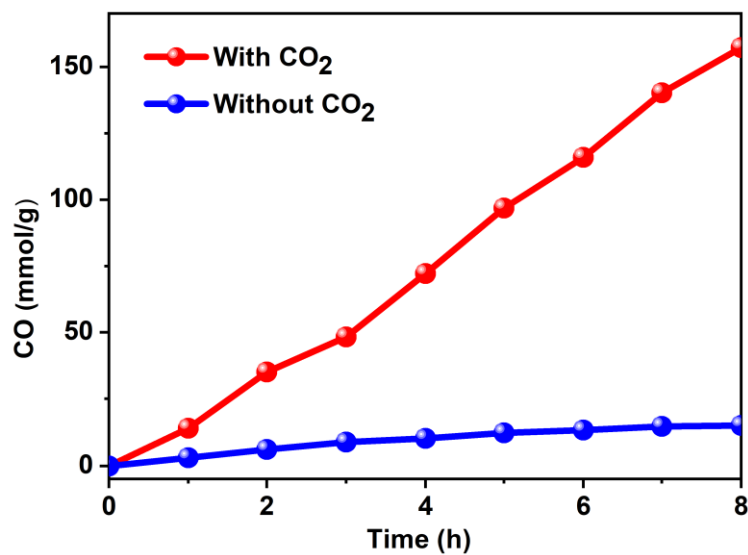

104  
 105 **Supplementary Figure 15: Identification of the catalytic products.** Production of CO in the  
 106 photocatalytic conversion of CO<sub>2</sub> with or without CO<sub>2</sub>. **Source data are provided as a Source Data file.**  
 107

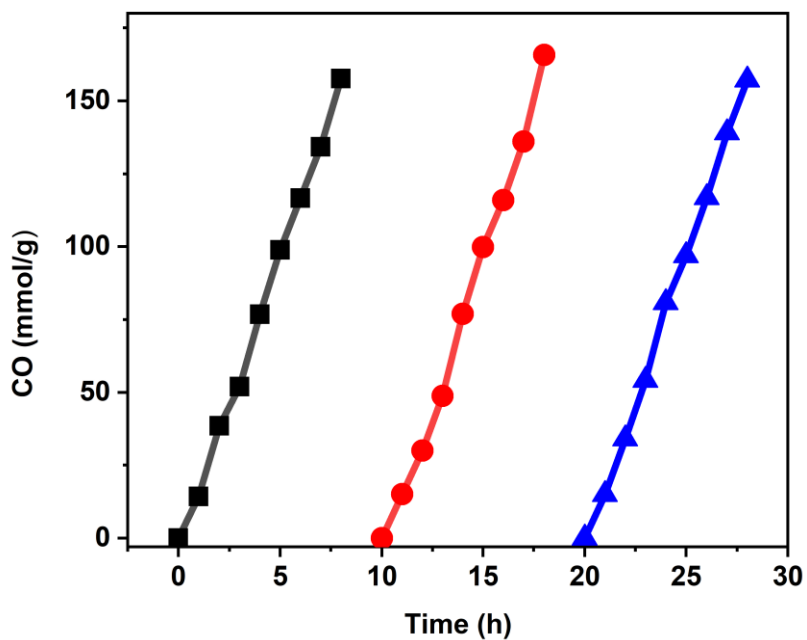

108  
 109  
 110 **Supplementary Figure 16: Reproducibility of catalytic reaction.** Recycle photocatalytic CO<sub>2</sub> reduction  
 111 experiments over Re-TpBpy under 440 nm excitation. **Source data are provided as a Source Data file.**  
 112  
 113

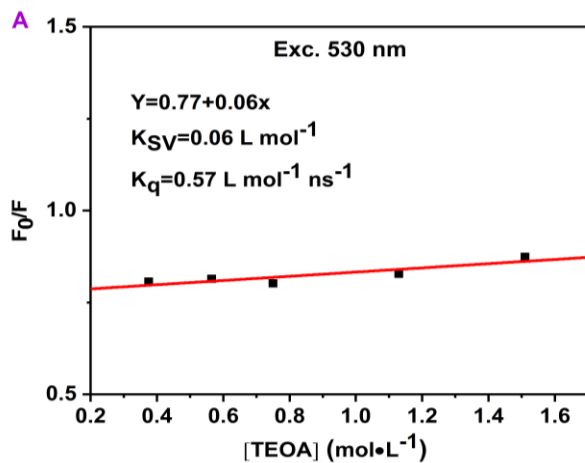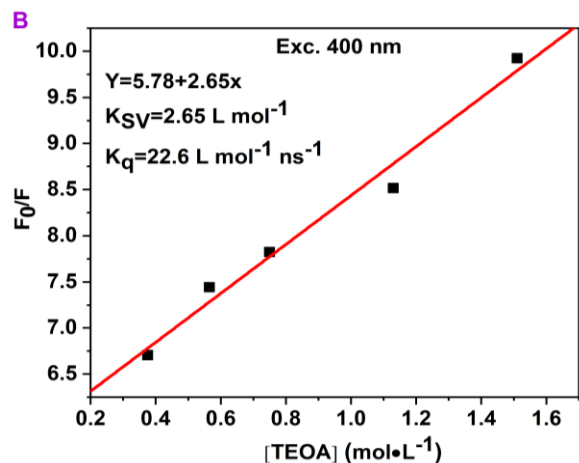

114  
 115 **Supplementary Figure 17: PL quenching experiment.** Stern-Volmer plot of Re-TpBpy (excited under  
 116 530 nm (A) and 400 nm (B)) describes the fluorescence quenching intensity vs. the TEOA concentration  
 117 over the range 0.37–1.51 mol L<sup>-1</sup>. **Source data are provided as a Source Data file.**  
 118

119 **Supplementary Tables**

120

121

122 **Supplementary Table 1: Optical and electrochemical properties of samples.**

| Sample   | $E_{\text{red,onset}}$ (V) | $\lambda_{\text{edge}}$ (nm) | $E_{\text{g}}^{\text{opt}}$ | HOMO (eV) | LUMO (eV) |
|----------|----------------------------|------------------------------|-----------------------------|-----------|-----------|
| Tp       | -1.05                      | 403.8                        | 3.07                        | -0.28     | -3.35     |
| Bpy      | -0.48                      | 458.8                        | 2.70                        | -1.22     | -3.92     |
| TpBpy    | 0.15                       | 558.4                        | 2.22                        | -2.33     | -4.55     |
| Re-TpBpy | -0.72                      | 567.6                        | 2.18                        | -1.50     | -3.68     |
| Re-Bpy   | -1.29                      | 435.0                        | 2.85                        | -0.26     | -3.11     |

123

124

125

126

127

128

129

130

131

132

133

134

135

136

137

138

139

140

141

142

143

144

145

146

147 **Supplementary Table 2:** Calculated DFT energy levels of TpBpy fragment.

| Orbital Name | Orbital Number | Energy (eV)  | iso-surface images                                                                    |
|--------------|----------------|--------------|---------------------------------------------------------------------------------------|
| LUMO+12      | 240            | -0.96886231  | 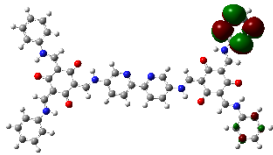   |
| LUMO+11      | 239            | -0.969700086 |    |
| LUMO+10      | 238            | -0.972883907 |    |
| LUMO+9       | 237            | -0.973715102 |   |
| LUMO+8       | 236            | -1.068732822 |  |
| LUMO+7       | 235            | -1.333214011 |  |
| LUMO+6       | 234            | -1.621848404 |  |
| LUMO+5       | 233            | -1.995218628 |  |

|        |     |              |                                                                                       |
|--------|-----|--------------|---------------------------------------------------------------------------------------|
| LUMO+4 | 232 | -2.034934733 | 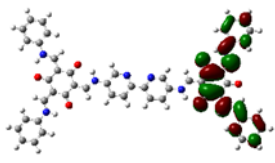   |
| LUMO+3 | 231 | -2.035340048 |    |
| LUMO+2 | 230 | -2.237486536 |    |
| LUMO+1 | 229 | -2.576204276 |    |
| LUMO   | 228 | -2.799618969 |   |
| HOMO   | 227 | -5.045478166 |  |
| HOMO-1 | 226 | -5.172556295 |  |
| HOMO-2 | 225 | -5.172573899 |  |

|         |     |              |                                                                                       |
|---------|-----|--------------|---------------------------------------------------------------------------------------|
| HOMO-3  | 224 | -5.365218278 | 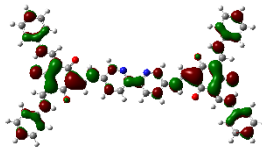   |
| HOMO-4  | 223 | -5.670073594 |    |
| HOMO-5  | 222 | -5.676649    |    |
| HOMO-6  | 221 | -5.718600616 |    |
| HOMO-7  | 220 | -5.940760198 |   |
| HOMO-8  | 219 | -6.053834645 |  |
| HOMO-9  | 218 | -6.200828562 |  |
| HOMO-10 | 217 | -6.205291056 |  |



|         |     |              |                                                                                     |
|---------|-----|--------------|-------------------------------------------------------------------------------------|
| HOMO-11 | 216 | -6.22438551  | 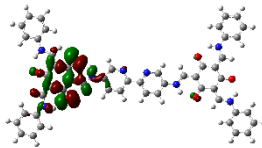 |
| HOMO-12 | 215 | -6.279711603 |  |

148  
149  
150  
151  
152  
153  
154  
155  
156  
157  
158  
159  
160  
161  
162  
163  
164  
165  
166  
167  
168  
169  
170  
171  
172  
173

174 **Supplementary Table 3:** Calculated DFT energy levels of Re-TpBpy fragment.

| Orbital Name | Orbital Number | Energy (eV)  | iso-surface images                                                                    |
|--------------|----------------|--------------|---------------------------------------------------------------------------------------|
| LUMO+12      | 277            | -0.98413959  | 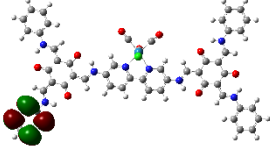   |
| LUMO+11      | 276            | -0.986257352 |    |
| LUMO+10      | 275            | -1.078184819 |    |
| LUMO+9       | 274            | -1.283727355 |   |
| LUMO+8       | 273            | -1.402089054 |  |
| LUMO+7       | 272            | -1.867455072 |  |
| LUMO+6       | 271            | -1.993478502 |  |
| LUMO+5       | 270            | -2.067937563 |  |

|        |     |              |                                                                                       |
|--------|-----|--------------|---------------------------------------------------------------------------------------|
| LUMO+4 | 269 | -2.068107788 | 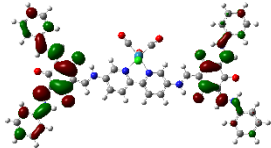   |
| LUMO+3 | 268 | -2.196090793 |    |
| LUMO+2 | 267 | -2.455782405 |    |
| LUMO+1 | 266 | -2.655408515 |    |
| LUMO   | 265 | -3.092359577 |   |
| HOMO   | 264 | -5.197598202 |  |
| HOMO-1 | 263 | -5.19983685  |  |
| HOMO-2 | 262 | -5.206329891 |  |

|         |     |              |                                                                                       |
|---------|-----|--------------|---------------------------------------------------------------------------------------|
| HOMO-3  | 261 | -5.429726984 | 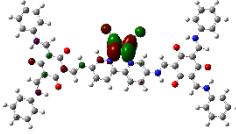   |
| HOMO-4  | 260 | -5.450935274 |    |
| HOMO-5  | 259 | -5.529614132 |    |
| HOMO-6  | 258 | -5.724384074 |    |
| HOMO-7  | 257 | -5.72505861  |  |
| HOMO-8  | 256 | -5.811185661 |  |
| HOMO-9  | 255 | -5.893560943 |  |
| HOMO-10 | 254 | -6.051646689 |  |

|         |     |              |                                                                                     |
|---------|-----|--------------|-------------------------------------------------------------------------------------|
| HOMO-11 | 253 | -6.242005536 | 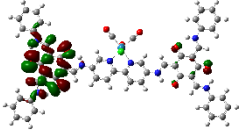 |
| HOMO-12 | 252 | -6.242635938 |  |

175  
176  
177  
178  
179  
180  
181  
182  
183  
184  
185  
186  
187  
188  
189  
190  
191  
192  
193  
194  
195  
196  
197  
198  
199  
200

201 **Supplementary Table 4:** Atomistic coordinates of TpBpy-AA optimized by using DFT method.

202 Space group: *P*-6;

203  $a = b = 29.8346 \text{ \AA}$ ,  $c = 3.6445 \text{ \AA}$ ;

204  $\alpha = \beta = 90^\circ$ ,  $\gamma = 120^\circ$ .

| Atom | $x/a$   | $y/b$    | $z/c$ |
|------|---------|----------|-------|
| C    | 0.49681 | -0.53229 | -0.5  |
| C    | 0.46766 | -0.5868  | -0.5  |
| C    | 0.49265 | -0.61542 | -0.5  |
| C    | 0.54689 | -0.58948 | -0.5  |
| C    | 0.57318 | -0.53496 | -0.5  |
| N    | 0.54931 | -0.50721 | -0.5  |
| N    | 0.57174 | -0.61881 | -0.5  |
| C    | 0.62304 | -0.60123 | -0.5  |
| C    | 0.6435  | -0.63404 | -0.5  |
| C    | 0.60977 | -0.6902  | -0.5  |
| O    | 0.72841 | -0.56111 | -0.5  |
| H    | 0.55054 | -0.65954 | -0.5  |
| C    | 0.47198 | -0.49978 | -0.5  |
| N    | 0.50378 | -0.44766 | -0.5  |
| C    | 0.48261 | -0.41752 | -0.5  |
| C    | 0.42891 | -0.43621 | -0.5  |
| C    | 0.39593 | -0.48999 | -0.5  |
| C    | 0.41777 | -0.52157 | -0.5  |
| N    | 0.41185 | -0.40019 | -0.5  |
| C    | 0.36251 | -0.41033 | -0.5  |
| C    | 0.34919 | -0.37194 | -0.5  |
| C    | 0.38891 | -0.31726 | -0.5  |
| O    | 0.26019 | -0.43642 | -0.5  |
| H    | 0.43816 | -0.36018 | -0.5  |
| H    | 0.42552 | -0.60725 | -0.5  |
| H    | 0.47074 | -0.65766 | -0.5  |
| H    | 0.61548 | -0.51266 | -0.5  |
| H    | 0.64985 | -0.55959 | -0.5  |
| H    | 0.50933 | -0.37562 | -0.5  |
| H    | 0.354   | -0.5071  | -0.5  |
| H    | 0.39207 | -0.56335 | -0.5  |
| H    | 0.33129 | -0.45057 | -0.5  |

205

206

207

208

209 **Supplementary Table 5:** Atomistic coordinates of TpBpy-AB optimized by using DFT method.



210 Space group: *P*-6;

211  $a = b = 29.7647 \text{ \AA}$ ,  $c = 6.1262 \text{ \AA}$ ;

212  $\alpha = \beta = 90^\circ$ ,  $\gamma = 120^\circ$ .

| Atom | $x/a$   | $y/b$   | $z/c$ |
|------|---------|---------|-------|
| C    | 1.82204 | 1.12635 | 0     |
| C    | 1.79351 | 1.07167 | 0     |
| C    | 1.8194  | 1.04367 | 0     |
| C    | 1.87383 | 1.07047 | 0     |
| C    | 1.89941 | 1.12511 | 0     |
| N    | 1.87471 | 1.15217 | 0     |
| N    | 1.89997 | 1.0422  | 0     |
| C    | 1.9517  | 1.06154 | 0     |
| C    | 1.97441 | 1.03057 | 0     |
| C    | 1.94272 | 0.97402 | 0     |
| O    | 2.05796 | 1.10623 | 0     |
| H    | 1.87973 | 1.00149 | 0     |
| C    | 1.79691 | 1.15875 | 0     |
| N    | 1.82918 | 1.21098 | 0     |
| C    | 1.80843 | 1.24156 | 0     |
| C    | 1.75465 | 1.22328 | 0     |
| C    | 1.72106 | 1.16939 | 0     |
| C    | 1.74257 | 1.13726 | 0     |
| N    | 1.73887 | 1.26022 | 0     |
| C    | 1.69036 | 1.25213 | 0     |
| C    | 1.6797  | 1.29263 | 0     |
| C    | 1.72145 | 1.34657 | 0     |
| O    | 1.58967 | 1.23136 | 0     |
| H    | 1.7664  | 1.30001 | 0     |
| H    | 1.75125 | 1.0507  | 0     |
| H    | 1.79798 | 1.00133 | 0     |
| H    | 1.94175 | 1.14814 | 0     |
| H    | 1.97725 | 1.10351 | 0     |
| H    | 1.83551 | 1.28349 | 0     |
| H    | 1.67905 | 1.15264 | 0     |
| H    | 1.71661 | 1.09539 | 0     |
| H    | 1.65786 | 1.2124  | 0     |
| C    | 0.48861 | 0.45891 | 0.5   |
| C    | 0.45976 | 0.40421 | 0.5   |
| C    | 0.4853  | 0.37582 | 0.5   |
| C    | 0.53975 | 0.40232 | 0.5   |
| C    | 0.56563 | 0.457   | 0.5   |
| N    | 0.54126 | 0.48436 | 0.5   |
| N    | 0.56586 | 0.37406 | 0.5   |

|   |         |         |     |
|---|---------|---------|-----|
| C | 0.61768 | 0.39391 | 0.5 |
| C | 0.64066 | 0.36333 | 0.5 |
| C | 0.60949 | 0.30688 | 0.5 |
| O | 0.72361 | 0.43957 | 0.5 |
| H | 0.54596 | 0.33334 | 0.5 |
| C | 0.46399 | 0.49178 | 0.5 |
| N | 0.49656 | 0.54395 | 0.5 |
| C | 0.47619 | 0.5749  | 0.5 |
| C | 0.42251 | 0.55705 | 0.5 |
| C | 0.38866 | 0.50323 | 0.5 |
| C | 0.40973 | 0.47074 | 0.5 |
| N | 0.40686 | 0.59427 | 0.5 |
| C | 0.35811 | 0.5861  | 0.5 |
| C | 0.34694 | 0.62621 | 0.5 |
| C | 0.38843 | 0.68043 | 0.5 |
| O | 0.2568  | 0.56442 | 0.5 |
| H | 0.43442 | 0.63406 | 0.5 |
| H | 0.41749 | 0.38347 | 0.5 |
| H | 0.46354 | 0.33346 | 0.5 |
| H | 0.60796 | 0.47979 | 0.5 |
| H | 0.6429  | 0.43583 | 0.5 |
| H | 0.50356 | 0.61677 | 0.5 |
| H | 0.34671 | 0.48683 | 0.5 |
| H | 0.38352 | 0.42892 | 0.5 |
| H | 0.32578 | 0.54626 | 0.5 |

213  
214  
215  
216  
217  
218  
219  
220  
221  
222  
223  
224  
225  
226  
227

228 **Supplementary Table 6:** Atomistic coordinates of TpBp-n\_propanol.

229 Space group: *P*-6;

230  $a = b = 29.7171 \text{ \AA}$ ,  $c = 3.6389 \text{ \AA}$ ;

231  $\alpha = \beta = 90^\circ$ ,  $\gamma = 120^\circ$ .

232

| Atom | $x \text{ (\AA)}$ | $y \text{ (\AA)}$ | $z \text{ (\AA)}$ |
|------|-------------------|-------------------|-------------------|
| C    | 12.82607          | 8.28556           | 2.55511           |
| C    | 13.45496          | 7.06020           | 2.78772           |
| C    | 14.82914          | 6.98689           | 2.77993           |
| C    | 15.57025          | 8.13988           | 2.53708           |
| C    | 14.86423          | 9.32363           | 2.31420           |
| N    | 13.54423          | 9.39525           | 2.32468           |
| N    | 16.95759          | 8.05678           | 2.53155           |
| C    | 17.82925          | 9.04245           | 2.34057           |
| C    | 19.20221          | 8.90143           | 2.34951           |
| C    | 19.83544          | 7.61748           | 2.57592           |
| O    | 19.41644          | 11.21299          | 1.93258           |
| H    | 17.39390          | 7.14591           | 2.69329           |
| C    | 11.35888          | 8.41665           | 2.55693           |
| N    | 10.84719          | 9.64553           | 2.72987           |
| C    | 9.53595           | 9.79424           | 2.73398           |
| C    | 8.63153           | 8.74398           | 2.56386           |
| C    | 9.15480           | 7.46825           | 2.37948           |
| C    | 10.52345          | 7.31106           | 2.37884           |
| N    | 7.27541           | 9.04021           | 2.58461           |
| C    | 6.26091           | 8.19419           | 2.43942           |
| C    | 4.92571           | 8.54401           | 2.45996           |
| C    | 4.50097           | 9.91679           | 2.65064           |
| O    | 4.35359           | 6.28294           | 2.11228           |
| H    | 6.98782           | 10.01278          | 2.71924           |
| H    | 12.87726          | 6.17008           | 2.99502           |
| H    | 15.33747          | 6.04880           | 2.96769           |
| H    | 15.38984          | 10.25146          | 2.11454           |
| H    | 17.43134          | 10.03433          | 2.16596           |
| H    | 9.15278           | 10.80138          | 2.88183           |
| H    | 8.51277           | 6.61066           | 2.23157           |
| H    | 10.93942          | 6.32606           | 2.21804           |
| H    | 6.50186           | 7.14816           | 2.29282           |
| C    | 25.17733          | 2.46452           | 3.50020           |
| C    | 25.86933          | 3.63980           | 3.24436           |
| C    | 25.18371          | 4.82098           | 3.02469           |
| C    | 23.78974          | 4.83829           | 3.05894           |
| C    | 23.09088          | 3.66029           | 3.31675           |

|   |          |          |         |
|---|----------|----------|---------|
| C | 23.78958 | 2.48538  | 3.53452 |
| N | 23.15734 | 6.06423  | 2.82988 |
| C | 21.85689 | 6.31513  | 2.79629 |
| C | 21.28822 | 7.55687  | 2.57191 |
| C | 22.09939 | 8.73511  | 2.34742 |
| O | 19.14747 | 6.58811  | 2.77095 |
| H | 23.74065 | 6.88773  | 2.66708 |
| H | 26.95160 | 3.64009  | 3.21484 |
| H | 25.71928 | 5.74115  | 2.82398 |
| H | 22.01009 | 3.65359  | 3.35105 |
| H | 21.18355 | 5.48187  | 2.95679 |
| C | 0.04363  | 15.87067 | 3.39866 |
| C | -0.82902 | 14.80996 | 3.20089 |
| C | -0.34174 | 13.52688 | 3.02797 |
| C | 1.03246  | 13.29143 | 3.05180 |
| C | 1.91247  | 14.35353 | 3.25108 |
| C | 1.41123  | 15.63239 | 3.42207 |
| N | 1.46192  | 11.97301 | 2.87193 |
| C | 2.70732  | 11.52291 | 2.83768 |
| C | 3.07493  | 10.20092 | 2.65645 |
| C | 2.08920  | 9.15531  | 2.48019 |
| O | 5.34182  | 10.83295 | 2.80681 |
| H | 0.75538  | 11.24494 | 2.74837 |
| H | -1.01779 | 12.69466 | 2.87235 |
| H | 2.98116  | 14.18948 | 3.27422 |
| H | 2.10149  | 16.45222 | 3.57633 |
| H | 3.50218  | 12.24865 | 2.96017 |
| C | -0.88193 | 2.37933  | 1.39553 |
| C | 0.48865  | 2.16471  | 1.36233 |
| C | 1.36591  | 3.21891  | 1.54322 |
| C | 0.87717  | 4.50677  | 1.76077 |
| C | -0.49874 | 4.72642  | 1.79675 |
| C | -1.36508 | 3.66256  | 1.61334 |
| N | 1.81513  | 5.52899  | 1.93622 |
| C | 1.58419  | 6.82018  | 2.12301 |
| C | 2.55698  | 7.78994  | 2.29141 |
| C | 3.96579  | 7.46304  | 2.27749 |
| O | 0.86382  | 9.41825  | 2.48944 |
| H | 2.80732  | 5.28467  | 1.92048 |
| H | 2.43699  | 3.05690  | 1.51728 |
| H | -0.89682 | 5.71716  | 1.96830 |
| H | -2.43249 | 3.84183  | 1.64282 |
| H | 0.55064  | 7.14407  | 2.14429 |
| C | 23.98050 | 15.84298 | 0.99744 |

|   |          |          |         |
|---|----------|----------|---------|
| C | 22.59505 | 15.86256 | 1.07404 |
| C | 21.89144 | 14.69437 | 1.30601 |
| C | 22.57163 | 13.48768 | 1.46447 |
| C | 23.96270 | 13.46287 | 1.38593 |
| C | 24.65440 | 14.63928 | 1.15440 |
| N | 21.80353 | 12.34220 | 1.69475 |
| C | 22.23372 | 11.10816 | 1.91167 |
| C | 21.42496 | 10.00536 | 2.12426 |
| C | 19.98252 | 10.11167 | 2.12301 |
| O | 23.35077 | 8.66340  | 2.34530 |
| H | 20.78577 | 12.43383 | 1.70162 |
| H | 22.05530 | 16.79321 | 0.95291 |
| H | 20.80989 | 14.70286 | 1.36812 |
| H | 24.50650 | 12.53533 | 1.50045 |
| H | 23.30532 | 10.94997 | 1.92505 |
| H | 25.71343 | 1.54035  | 3.67234 |
| H | 23.23899 | 1.57478  | 3.73477 |
| H | -0.33747 | 16.87448 | 3.53368 |
| H | -1.89803 | 14.98007 | 3.18032 |
| H | -1.56841 | 1.55483  | 1.25402 |
| H | 0.88091  | 1.16969  | 1.19436 |
| H | 24.53110 | 16.75672 | 0.81572 |
| H | 25.73515 | 14.61171 | 1.09417 |

233  
234  
235  
236  
237  
238  
239  
240  
241  
242  
243  
244  
245  
246  
247  
248  
249  
250  
251  
252  
253  
254  
255  
256  
257

258 **Supplementary Table 7:** Atomistic coordinates of Re-TpBpy -n\_propanol.

259

260 Space group: *P3*;

261  $a = b = 29.712 \text{ \AA}$ ,  $c = 9.4234 \text{ \AA}$ ;

262  $\alpha = \beta = 90^\circ$ ,  $\gamma = 120^\circ$ .

263

| Atom | $x (\text{\AA})$ | $y (\text{\AA})$ | $z (\text{\AA})$ |
|------|------------------|------------------|------------------|
| Re   | 11.90630         | 11.62434         | 2.51252          |
| C    | 13.34728         | 12.87699         | 2.65634          |
| C    | 10.70622         | 13.11024         | 2.63530          |
| Cl   | 11.85313         | 11.15375         | 5.00108          |
| C    | 11.93848         | 11.86514         | 0.62711          |
| O    | 14.22872         | 13.62434         | 2.73320          |
| O    | 11.95970         | 12.03195         | -0.52248         |
| C    | 12.36680         | 8.57097          | 2.46530          |
| C    | 13.03362         | 7.34795          | 2.47652          |
| C    | 14.40565         | 7.31227          | 2.47218          |
| C    | 15.12441         | 8.50731          | 2.45467          |
| C    | 14.40366         | 9.69781          | 2.44060          |
| N    | 13.07256         | 9.72446          | 2.44783          |
| N    | 16.50632         | 8.45742          | 2.44959          |
| C    | 17.36165         | 9.48123          | 2.46355          |
| C    | 18.73202         | 9.35907          | 2.44970          |
| C    | 19.38389         | 8.06148          | 2.41564          |
| O    | 18.91614         | 11.71015         | 2.50207          |
| H    | 16.96229         | 7.54094          | 2.43391          |
| C    | 10.91775         | 8.69992          | 2.46339          |
| N    | 10.42593         | 9.96032          | 2.43986          |
| C    | 9.11168          | 10.15747         | 2.43069          |
| C    | 8.19155          | 9.11228          | 2.44498          |
| C    | 8.68571          | 7.80901          | 2.47030          |
| C    | 10.04599         | 7.61402          | 2.47873          |
| N    | 6.84848          | 9.43816          | 2.43322          |
| C    | 5.81511          | 8.59586          | 2.46421          |
| C    | 4.49171          | 8.97248          | 2.45092          |
| C    | 4.09511          | 10.36854         | 2.39502          |
| O    | 3.87220          | 6.69893          | 2.54400          |
| H    | 6.57596          | 10.42454         | 2.39973          |
| H    | 12.47678         | 6.42289          | 2.48958          |
| H    | 14.93470         | 6.36784          | 2.48236          |
| H    | 14.89880         | 10.65805         | 2.42199          |
| H    | 16.94924         | 10.48225         | 2.48916          |
| H    | 8.76698          | 11.18404         | 2.41323          |
| H    | 8.02260          | 6.95584          | 2.48210          |



|   |          |          |         |
|---|----------|----------|---------|
| H | 10.43444 | 6.60660  | 2.49837 |
| H | 6.03485  | 7.53606  | 2.50520 |
| C | 24.76904 | 2.88971  | 2.22634 |
| C | 25.45391 | 4.09655  | 2.22124 |
| C | 24.76135 | 5.29355  | 2.25852 |
| C | 23.36784 | 5.29346  | 2.30188 |
| C | 22.67577 | 4.08401  | 2.30785 |
| C | 23.38128 | 2.89383  | 2.26999 |
| N | 22.72415 | 6.53444  | 2.33863 |
| C | 21.42157 | 6.76927  | 2.36306 |
| C | 20.83528 | 8.02333  | 2.39733 |
| C | 21.63021 | 9.23375  | 2.41268 |
| O | 18.70857 | 7.00644  | 2.40184 |
| H | 23.29750 | 7.38084  | 2.34571 |
| H | 26.53596 | 4.10934  | 2.18779 |
| H | 25.29117 | 6.23856  | 2.25418 |
| H | 21.59506 | 4.06587  | 2.34335 |
| H | 20.76148 | 5.91038  | 2.35454 |
| C | -0.27387 | 16.43984 | 2.20549 |
| C | -1.15916 | 15.37166 | 2.23481 |
| C | -0.68537 | 14.07275 | 2.27584 |
| C | 0.68756  | 13.82876 | 2.28802 |
| C | 1.58038  | 14.89849 | 2.25971 |
| C | 1.09234  | 16.19315 | 2.21842 |
| N | 1.09932  | 12.49278 | 2.32993 |
| C | 2.33579  | 12.02015 | 2.34076 |
| C | 2.67653  | 10.67841 | 2.38929 |
| C | 1.66925  | 9.63901  | 2.43575 |
| O | 4.95686  | 11.27640 | 2.35245 |
| H | 0.38072  | 11.76636 | 2.35888 |
| H | -1.37126 | 13.23425 | 2.29864 |
| H | 2.64848  | 14.73007 | 2.27035 |
| H | 1.79204  | 17.01917 | 2.19666 |
| H | 3.14639  | 12.73816 | 2.31010 |
| C | -1.45038 | 2.85445  | 2.82253 |
| C | -0.08566 | 2.60513  | 2.79391 |
| C | 0.81477  | 3.65284  | 2.72234 |
| C | 0.35515  | 4.96856  | 2.67863 |
| C | -1.01454 | 5.22371  | 2.70831 |
| C | -1.90435 | 4.16581  | 2.77945 |
| N | 1.31579  | 5.98285  | 2.60783 |
| C | 1.11268  | 7.29001  | 2.54923 |
| C | 2.10711  | 8.25181  | 2.49334 |
| C | 3.50695  | 7.89552  | 2.49855 |

|   |          |          |         |
|---|----------|----------|---------|
| O | 0.44952  | 9.92515  | 2.42745 |
| H | 2.30196  | 5.71531  | 2.60432 |
| H | 1.88145  | 3.46366  | 2.69980 |
| H | -1.38992 | 6.23739  | 2.67764 |
| H | -2.96700 | 4.37220  | 2.80223 |
| H | 0.08613  | 7.63581  | 2.54630 |
| C | 23.44139 | 16.48300 | 2.58323 |
| C | 22.05455 | 16.47459 | 2.62818 |
| C | 21.36202 | 15.27737 | 2.60302 |
| C | 22.05485 | 14.06960 | 2.53203 |
| C | 23.44789 | 14.07316 | 2.48661 |
| C | 24.12811 | 15.27837 | 2.51294 |
| N | 21.29573 | 12.89447 | 2.50883 |
| C | 21.73675 | 11.64677 | 2.46992 |
| C | 20.93991 | 10.51475 | 2.45098 |
| C | 19.49817 | 10.60264 | 2.47005 |
| O | 22.88169 | 9.17994  | 2.39436 |
| H | 20.27761 | 12.97604 | 2.52581 |
| H | 21.50479 | 17.40559 | 2.68345 |
| H | 20.27934 | 15.26388 | 2.63921 |
| H | 24.00313 | 13.14681 | 2.42971 |
| H | 22.80950 | 11.49906 | 2.45347 |
| H | 25.31104 | 1.95352  | 2.19736 |
| H | 22.83649 | 1.95816  | 2.27540 |
| H | -0.64407 | 17.45620 | 2.17330 |
| H | -2.22727 | 15.54817 | 2.22568 |
| H | -2.15491 | 2.03494  | 2.87864 |
| H | 0.28373  | 1.58804  | 2.82746 |
| H | 23.98364 | 17.41931 | 2.60267 |
| H | 25.21026 | 15.27308 | 2.47690 |
| O | 9.96839  | 14.00103 | 2.69623 |

264  
265  
266  
267  
268  
269  
270  
271

272 **Supplementary Table 8:** Molecular orbital transitions and their contributions to each excited state in  
273 TpBpy, including excitation energy (in eV), wavelength (in nm), oscillator strength (f) and orbital  
274 contributions (in %).

275

276 # 1 2.3455 eV 528.60 nm f= 1.66360 Spin multiplicity= 1:

277 H -> L 97.9%

278

279 # 2 2.4172 eV 512.92 nm f= 0.02990 Spin multiplicity= 1:

280 H-2 -> L 68.3%, H-1 -> L 22.8%, H-2 -> L+1 6.5%

281

282 # 3 2.4260 eV 511.06 nm f= 0.03840 Spin multiplicity= 1:

283 H-1 -> L 67.4%, H-2 -> L 22.5%, H-1 -> L+1 7.3%

284

285 # 4 2.5128 eV 493.41 nm f= 0.00000 Spin multiplicity= 1:

286 H -> L+1 70.7%, H-3 -> L 29.0%

287

288 # 5 2.7021 eV 458.84 nm f= 0.16450 Spin multiplicity= 1:

289 H-1 -> L+1 61.5%, H-2 -> L+1 21.2%, H-1 -> L+2 6.3%, H-1 -> L 5.6%

290

291 # 6 2.7238 eV 455.19 nm f= 0.21360 Spin multiplicity= 1:

292 H-2 -> L+1 61.4%, H-1 -> L+1 21.0%, H-2 -> L+2 6.6%, H-2 -> L 5.1%

293

294 # 7 2.7423 eV 452.12 nm f= 0.00720 Spin multiplicity= 1:

295 H-3 -> L 63.7%, H -> L+1 24.3%

296

297 # 8 2.8424 eV 436.20 nm f= 0.78090 Spin multiplicity= 1:

298 H-3 -> L+1 50.4%, H -> L+2 46.2%

299

300 # 9 2.8714 eV 431.79 nm f= 0.00030 Spin multiplicity= 1:

301 H-4 -> L 99.8%

302

303 # 10 2.8780 eV 430.80 nm f= 0.00020 Spin multiplicity= 1:

304 H-5 -> L 100.0%

305

306 # 11 2.8904 eV 428.95 nm f= 0.02010 Spin multiplicity= 1:

307 H-6 -> L 36.7%, H-3 -> L+1 33.4%, H -> L+2 27.6%

308

309 # 12 2.9792 eV 416.17 nm f= 0.07450 Spin multiplicity= 1:

310 H-2 -> L+2 47.6%, H -> L+4 30.9%, H-1 -> L+2 16.3%

311

312 # 13 2.9877 eV 414.98 nm f= 0.06480 Spin multiplicity= 1:

313 H -> L+3 45.0%, H-1 -> L+2 38.2%, H-2 -> L+2 12.9%

314

315 # 14 3.0132 eV 411.47 nm f= 0.27840 Spin multiplicity= 1:

316 H-6 -> L 50.5%, H -> L+2 17.6%, H-3 -> L+1 8.4%, H-2 -> L+4 8.2%, H-1 -> L+3 8.1%

317

318 # 15 3.0648 eV 404.54 nm f= 0.16330 Spin multiplicity= 1:

319 H -> L+4 58.7%, H-2 -> L+2 13.8%, H-2 -> L+5 13.0%

320

321 # 16 3.0873 eV 401.59 nm f= 0.25710 Spin multiplicity= 1:  
322 H -> L+3 43.9%, H-1 -> L+2 20.5%, H-1 -> L+5 15.8%, H-2 -> L+2 7.1%  
323  
324 # 17 3.0939 eV 400.74 nm f= 0.00000 Spin multiplicity= 1:  
325 H-4 -> L+1 99.7%  
326  
327 # 18 3.0990 eV 400.08 nm f= 0.00380 Spin multiplicity= 1:  
328 H -> L+5 59.0%, H-7 -> L 20.6%, H-3 -> L+2 12.6%  
329  
330 # 19 3.1004 eV 399.90 nm f= 0.00000 Spin multiplicity= 1:  
331 H-5 -> L+1 99.5%  
332  
333 # 20 3.1374 eV 395.18 nm f= 0.00000 Spin multiplicity= 1:  
334 H-2 -> L+3 75.5%, H-1 -> L+3 24.4%  
335  
336  
337  
338  
339  
340  
341  
342  
343  
344  
345  
346  
347  
348  
349  
350  
351  
352  
353  
354  
355  
356  
357

358 **Supplementary Table 9:** Molecular orbital transitions and their contributions to each excited state in Re-  
359 TpBpy, including excitation energy (in eV), wavelength (in nm), oscillator strength (f) and orbital  
360 contributions (in %).

361 # 1 2.1372 eV 580.12 nm f= 0.02050 Spin multiplicity= 1:

362 H-1 -> L 95.2%

363

364 # 2 2.1480 eV 577.21 nm f= 0.03070 Spin multiplicity= 1:

365 H -> L 88.0%, H-2 -> L 7.7%

366

367 # 3 2.2232 eV 557.68 nm f= 1.60280 Spin multiplicity= 1:

368 H-2 -> L 87.5%, H -> L 8.4%

369

370 # 4 2.3480 eV 528.04 nm f= 0.14830 Spin multiplicity= 1:

371 H-3 -> L 95.9%

372

373 # 5 2.4190 eV 512.54 nm f= 0.01670 Spin multiplicity= 1:

374 H-4 -> L 81.5%, H-2 -> L+1 7.6%, H-5 -> L 6.1%

375

376 # 6 2.4827 eV 499.39 nm f= 0.02360 Spin multiplicity= 1:

377 H-5 -> L 90.9%

378

379 # 7 2.5812 eV 480.34 nm f= 0.03390 Spin multiplicity= 1:

380 H -> L+1 80.3%, H -> L+2 8.4%, H-2 -> L+1 7.4%

381

382 # 8 2.6335 eV 470.80 nm f= 0.00020 Spin multiplicity= 1:

383 H-6 -> L 99.8%

384

385 # 9 2.6347 eV 470.58 nm f= 0.00000 Spin multiplicity= 1:

386 H-7 -> L 99.8%

387

388 # 10 2.6563 eV 466.76 nm f= 0.12160 Spin multiplicity= 1:

389 H-1 -> L+1 74.8%, H-1 -> L+2 17.4%

390

391 # 11 2.6722 eV 463.98 nm f= 0.00080 Spin multiplicity= 1:  
392 H-2 -> L+1 67.4%, H-4 -> L 7.6%, H -> L+1 6.9%  
393  
394 # 12 2.7690 eV 447.76 nm f= 0.11400 Spin multiplicity= 1:  
395 H-8 -> L 44.0%, H-2 -> L+2 28.0%, H-3 -> L+1 19.4%  
396  
397 # 13 2.7819 eV 445.68 nm f= 0.12630 Spin multiplicity= 1:  
398 H-3 -> L+1 67.6%, H-1 -> L+2 13.5%, H-8 -> L 10.2%  
399  
400 # 14 2.7834 eV 445.44 nm f= 0.11580 Spin multiplicity= 1:  
401 H-1 -> L+2 62.2%, H-1 -> L+1 11.5%, H-3 -> L+1 10.2%, H-2 -> L+2 5.0%  
402  
403 # 15 2.8025 eV 442.41 nm f= 0.00130 Spin multiplicity= 1:  
404 H-9 -> L 99.7%  
405  
406 # 16 2.8132 eV 440.72 nm f= 0.44470 Spin multiplicity= 1:  
407 H-4 -> L+1 41.1%, H-2 -> L+2 25.6%, H-8 -> L 23.4%  
408  
409 # 17 2.8790 eV 430.65 nm f= 0.00650 Spin multiplicity= 1:  
410 H-5 -> L+1 96.4%  
411  
412 # 18 2.8979 eV 427.84 nm f= 0.36030 Spin multiplicity= 1:  
413 H -> L+2 70.4%, H-2 -> L+2 7.6%, H -> L+1 6.2%  
414  
415 # 19 2.9265 eV 423.66 nm f= 0.02490 Spin multiplicity= 1:  
416 H-4 -> L+1 41.7%, H-2 -> L+2 19.0%, H-3 -> L+2 13.7%, H-8 -> L 7.3%  
417  
418 # 20 2.9936 eV 414.16 nm f= 0.00540 Spin multiplicity= 1:  
419 H-3 -> L+2 77.3%, H-4 -> L+2 10.1%  
420



421 **Supplementary References**

422 1. Chandra, S. *et al.* Chemically stable multilayered covalent organic nanosheets from covalent organic  
423 frameworks via mechanical delamination. *J. Am. Chem. Soc.* **135**, 17853–17861 (2013).

424 2. Zhong, W. *et al.* A Covalent Organic Framework Bearing Single Ni Sites as a Synergistic Photocatalyst  
425 for Selective Photoreduction of CO<sub>2</sub> to CO. *J. Am. Chem. Soc.* **141**, 7615–7621 (2019).

426 3. Aiyappa, H. B., Thote, J., Shinde, D. B., Banerjee, R. & Kurungot, S. Cobalt-Modified Covalent Organic  
427 Framework as a Robust Water Oxidation Electrocatalyst. *Chem. Mater.* **28**, 4375–4379 (2016).

428 4. Chandra, S. *et al.* Interplaying Intrinsic and Extrinsic Proton Conductivities in Covalent Organic  
429 Frameworks. *Chem. Mater.* **28**, 1489–1494 (2016).

430 5. Li, S.-Y. *et al.* Rhenium-functionalized covalent organic framework photocatalyst for efficient CO<sub>2</sub>  
431 reduction under visible light. *Microporous Mesoporous Mater.* **285**, 195–201 (2019).

432
